# Supplementary material for: Flash-induced reduced graphene oxide as a Sn anode host for high performance sodium ion batteries
Source: Royal Society of Chemistry journal article supplement (doi:10.1039/c6ta07582g), 2016-01-01
Supplement: c6ta07582g1.pdf [file c6ta07582g1.pdf]

### Supplementary information

#### Flash-Induced Reduced Graphene Oxide as Sn Anode Hosts for High Performance Sodium Ion Batteries

*Yeryung Jeon,<sup>a</sup> Xiaogang Han,<sup>b</sup> Kun Fu,<sup>b</sup> Jiaqi Dai,<sup>b</sup> Joo Hyun Kim,<sup>a</sup> Liangbing Hu,<sup>b</sup> Taeseup Song<sup>c\*</sup> and Ungyu Paik<sup>a\*</sup>*

Y. Jeon, J. Kim, Prof. U. Paik  
Department of Energy Engineering  
Hanyang University  
Seoul, 133-791, Republic of Korea  
\*E-mail: [upaik@hanyang.ac.kr](mailto:upaik@hanyang.ac.kr)

X. Han, K. Fu, J. Dai, Prof. L. Hu  
Department of Materials Science and Engineering  
University of Maryland  
College Park, Maryland 20742, USA

Prof. T. Song  
School of Materials Science and Engineering  
Yeungnam University  
Gyeongsan, 712-749, Republic of Korea  
\*E-mail: [tsong@yu.ac.kr](mailto:tsong@yu.ac.kr)

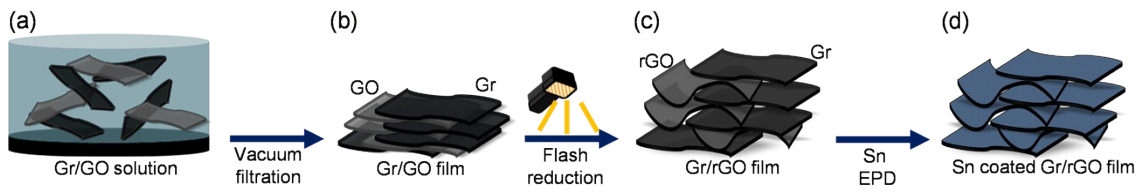

**Scheme S1.** Schematic illustration for the preparation of the Sn-coated RGO-graphene film.

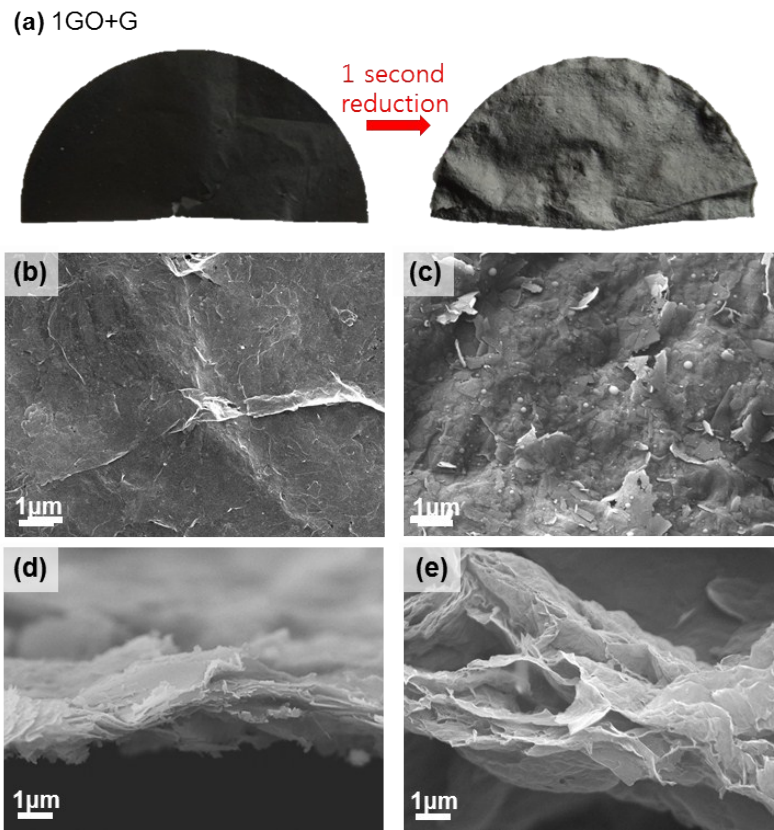

**Figure S1.** (a) Photographs of (1GO+G) before and after flash reduction. (b) Top view-, (d) cross sectional view-SEM images of (1GO+G) film before flash reduction. (c) Top view-, (e) cross sectional view-SEM images of (1GO+G) film after flash reduction. All scale bars indicate 1  $\mu\text{m}$ .

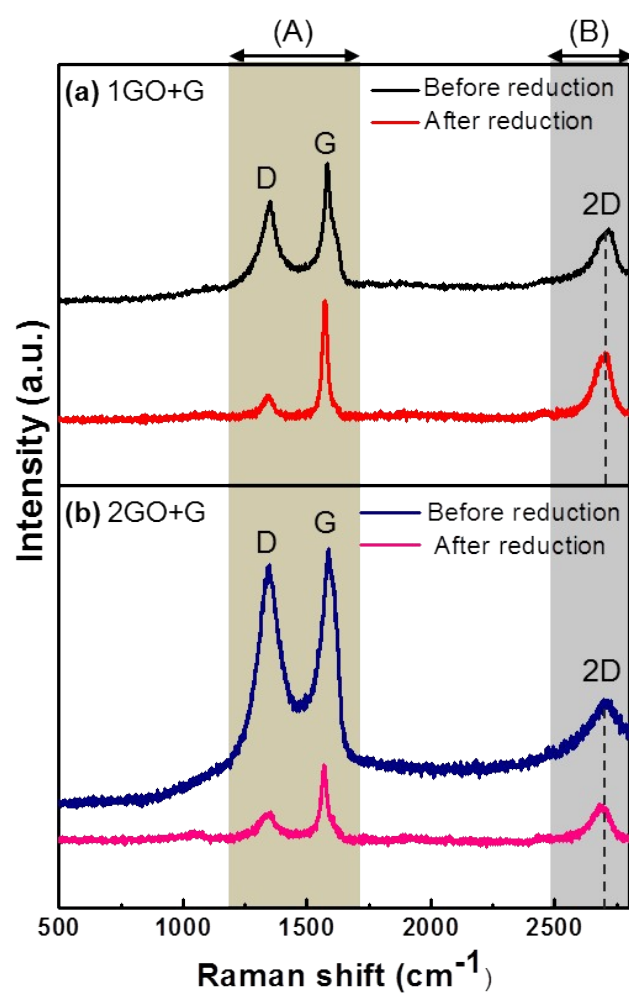

**Figure S2.** Raman spectra of (a) (1GO+G), (b) (2GO+G) electrodes before and after reduction.

In the region (A) and (b) involve D/G band peaks and 2D related peaks, respectively.

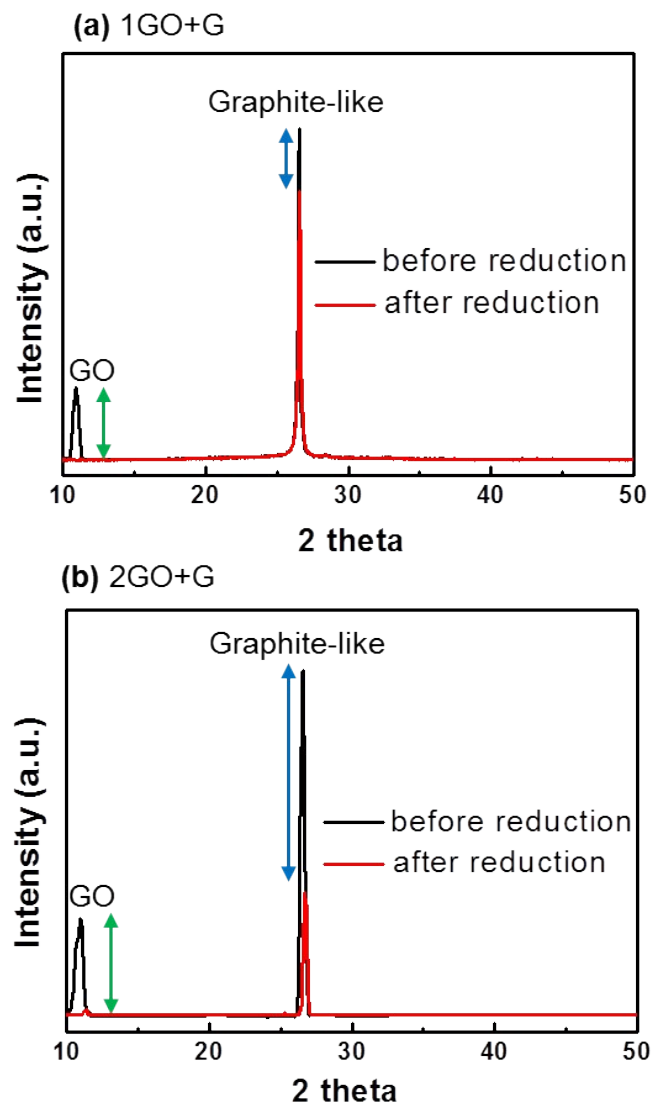

**Figure S3.** XRD analysis of (a) (1GO+G), (b) (2GO+G) films before and after reduction. Blue arrows indicate the graphite-like peak ( $2\theta = 26.52^\circ$ ) differences between ( $n$ GO+G) and ( $n$ RGO+G). Green arrows indicate the GO peak ( $2\theta = 10.27^\circ$ ) differences between ( $n$ GO+G) and ( $n$ RGO+G).

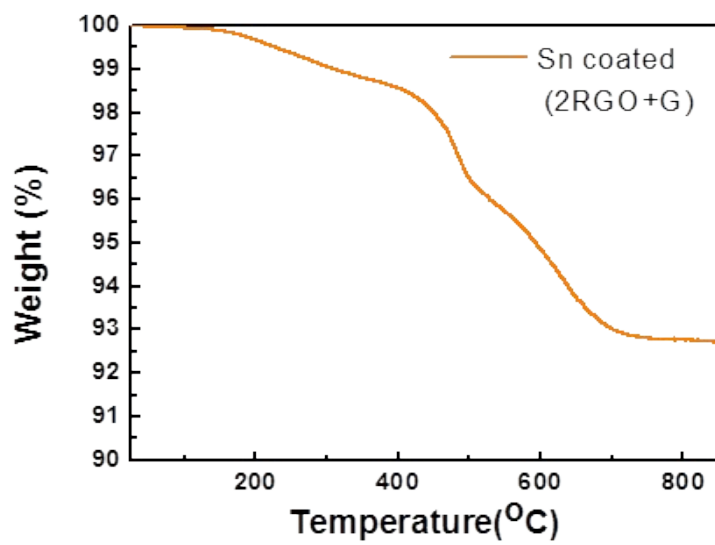

**Figure S4.** TGA curves of Sn-coated (2RGO+G) composite anode from room temperature to 850 °C.

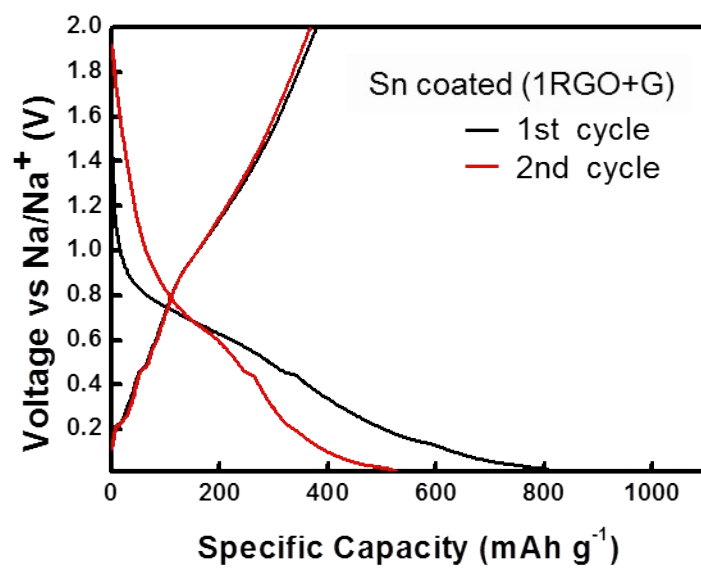

**Figure S5.** Voltage profiles for the 1<sup>st</sup> and 2<sup>nd</sup> cycles of Sn coated (1RGO+G) electrode at a rate of 0.5 C.

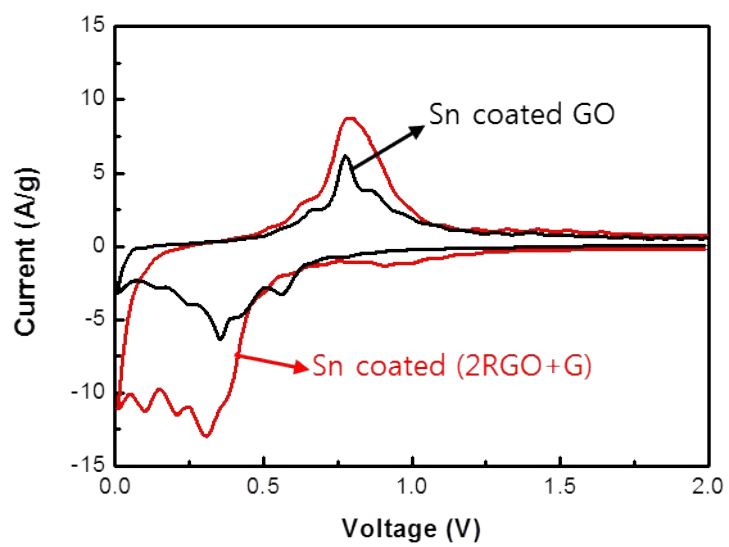

**Figure S6.** Cyclic voltammetry curves of Sn coated (2RGO+G) and Sn coated GO at a scanning rate of  $0.1 \text{ mV s}^{-1}$
